# Supplementary material for: The stacking fault annihilation in a-plane AlN during high-temperature annealing
Source: Royal Society of Chemistry journal article supplement (doi:10.1039/d2ce01654k), 2023-01-01
Supplement: d2ce01654k1.pdf [file d2ce01654k1.pdf]

## Supporting Information:

### The stacking faults annihilation in a-plane AlN during high temperature annealing

Xiaojuan Sun,<sup>\*ab</sup> Jiaen Sui,<sup>ab</sup> Jianwei Ben,<sup>ab</sup> Hang Zang,<sup>ab</sup> Ke Jiang,<sup>ab</sup> Shanli Zhang,<sup>ab</sup> Shunpeng Lv,<sup>ab</sup>  
Zhiming Shi,<sup>ab</sup> Tong Wu<sup>ab</sup> and Dabing Li<sup>\*ab</sup>

<sup>a</sup>. State Key Laboratory of Luminescence and Applications, Changchun Institute of Optics, Fine Mechanics and Physics, Chinese Academy of Sciences, Changchun 130033, China;

<sup>b</sup>. Center of Materials Science and Optoelectronics Engineering, University of Chinese Academy of Sciences, Beijing 100049, China.

E-mail: sunxj@ciomp.ac.cn; lidb@ciomp.ac.cn

### The $2\theta$ - $\omega$ scan curves of a-AlN with different annealing conditions:

The symmetric  $2\theta$ - $\omega$  scan curves of sputtered a-AlN/sapphire template with different annealing conditions are shown in Figure 1. It can be concluded that there are three strong diffraction peaks located at  $25.5^\circ$ ,  $52.6^\circ$  and  $59.5^\circ$ , corresponding to the diffractions of (1-102)/(2-204) r-plane sapphire substrate and nonpolar (11-20) AlN, respectively. Compared to the reflection intensity of the sputtered layer, the intensity of the peaks corresponding to (11-20) a-AlN layer is significantly increased (Fig. S1), indicating that the structural defects are smaller. In addition to the diffraction XRD peaks of sapphire and AlN, the  $2\theta$ - $\omega$  scan curve of the sample annealed at  $1750^\circ\text{C}$  shows several peaks, which corresponding to different crystal phases of  $\text{Al}_2\text{O}_3$ . The results indicate that the AlN surface was oxidation and decomposition during the annealing process.

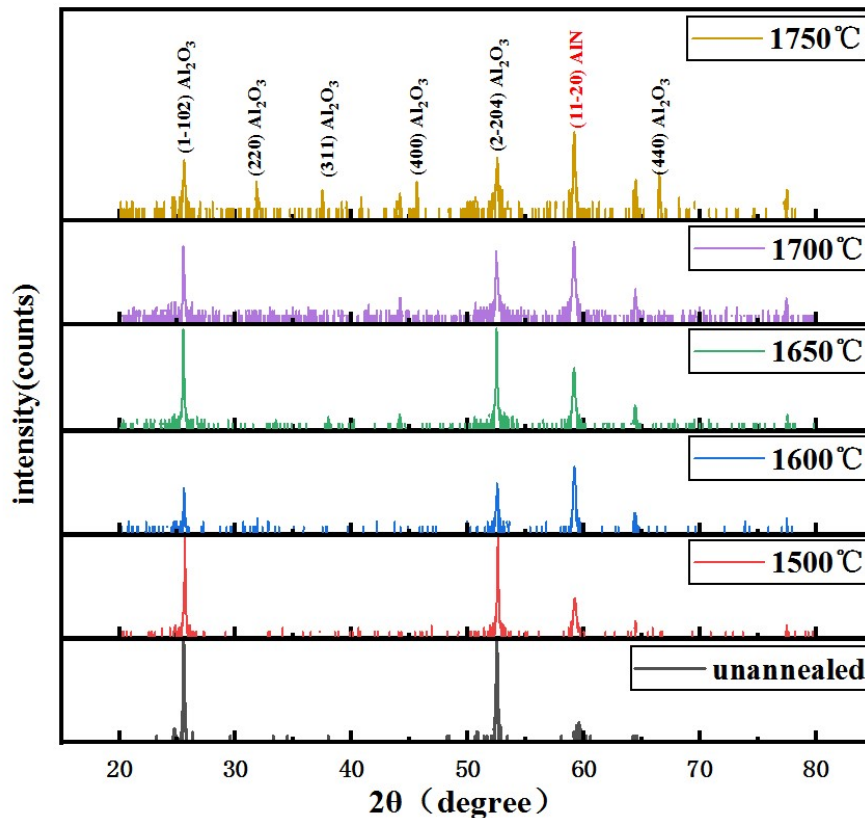

Figure S1. Symmetric  $\omega$ - $2\theta$  XRD scans of AlN layers without and with different annealing temperatures.

### The XRD $\phi$ scan result of (11-22) plane of a-AlN template without annealing

To obtain the XRCs of (11-22) plane of a-AlN template, the  $\phi$  scan is the essential step.

However, there is no diffraction peak in the  $\phi$  scan (0-360°) for the (11-22) plane a-AlN without annealing. which is a key step before rocking curve scanning. The result indicates that the intensity of the (11-22) plane XRC of a-AlN template is too weak to be tested, which means the BSFD is too high and the order of the crystal lattice is severely destroyed.

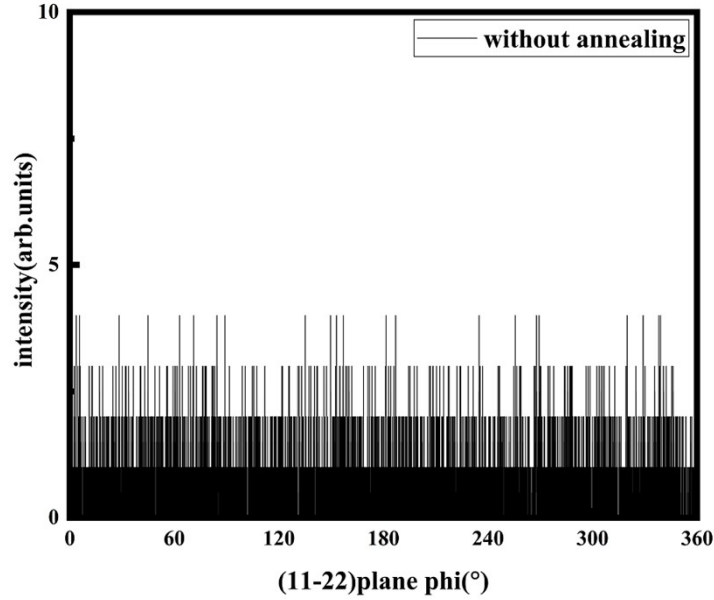

Figure S2. The XRD  $\phi$  scan result of (11-22) plane of a-AlN template without annealing

#### W-H plots of a-AlN with different annealing conditions:

For non-polar nitride films, the modified Williamson-Hall model is widely used as a non-destructive way to measure BSFD.<sup>[1]</sup> It is estimated by fitting with the FWHM of the XRC diffraction peak of (h0-h0) (h= 1,2,3). The x-ray is incident along the c-axis during the test, which means  $\chi = 30^\circ$  and  $\phi = 0^\circ$ . The relation used for W-H analysis can be expressed as follows:

$$\Delta\omega_{measure} = \Delta\omega_{mosaic} + \frac{\lambda}{2L\sin(\theta_{hkl})}$$

where  $\Delta\omega_{measure}$  is the FWHM of the  $\omega$ -scan of a reciprocal lattice points hkl, and  $\lambda$  is the wavelength of X-ray source ( $\lambda=0.15406$  nm),  $\theta_{hkl}$  is the Bragg angle for the hkl reflection,  $\Delta\omega_{mosaic}$  is tilt angles for the mosaic, L is the LCL (lateral coherence length), and the BSFD of the AlN layer is  $1/L$ . The LCL is extracted from the  $y_0$  of the linear fits for the (10-10) and (20-20) diffractions, as shown in Figure S3.

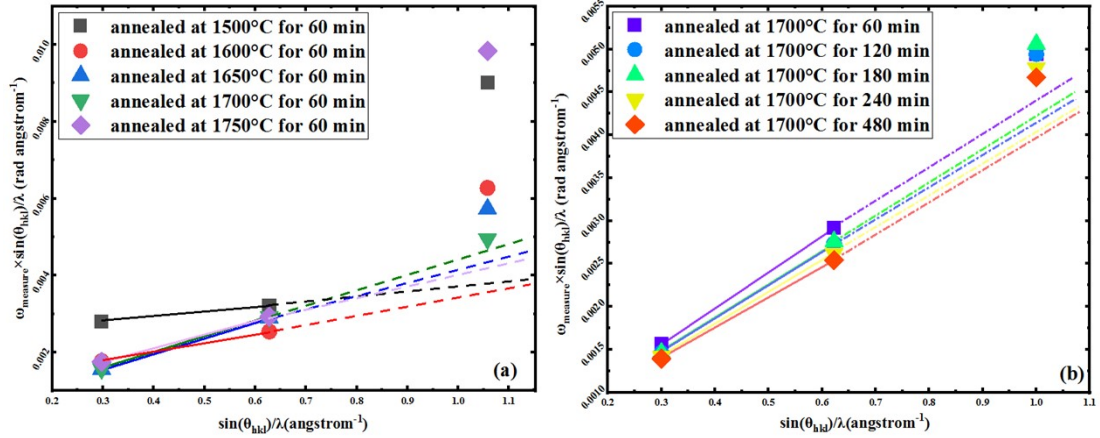

Figure S3 (a)W-H plots of a-AlN films annealed at different temperature for 60 min. (b)W-H plots of a-AlN films annealed a 1700°C for different time.

### The calculation details of the CI-NEB

In order to explain the mechanism of the decrease of BSFD during HTA process, the first-principles calculations were performed using the projected augmented wave (PAW) plane-wave basis,<sup>[2]</sup> with an energy cutoff of 400 eV, implemented in the Vienna ab initio simulation package (VASP).<sup>[3,4]</sup> The generalized gradient approximation (GGA) exchange-correlation DFT functional Perdew-Burke-Ernzerhof (PBE) was employed for the geometrical optimization.<sup>[5]</sup> The atomic positions were optimized using the conjugate gradient scheme until the maximum force on each atom is less than 0.02 eV/Å. The climbing-image nudged elastic band (CI-NEB) method was employed to locate the transition states during the movement of the stacking fault.<sup>[6]</sup>

The transition energy barriers are investigated during the elimination of the I1 stacking fault, which has higher percentage in a-AlN.<sup>[7]</sup> A 2 $\times$ 2 $\times$ 5 supercell of wz-AlN is built, Figure 3 structure A), the atoms follow the stacking sequence of [...AaBbAaBb...] (Capital letters correspond to Al, lowercase letter correspond to N) along the [0001] direction, the area along the [0001] direction is 33.91Å<sup>2</sup>. A 4 $\times$ 4 $\times$ 1 grid is used for the k-point sampling. Based on the wz-AlN, the I1 stacking fault of AlN is built (denoted as 2-layer-I1-AlN, Figure 3 structure I) with the stacking sequence of [...AaBbCcBbCcBbAaBb...] along the [0001] direction. The minimum energy pathway from wz-AlN to 2-layer-I1-AlN is calculated by inserting 19 images between the initial and final state, the energy barrier and atomic structures during the reaction are shown in Figure 3.

### Reference

- [1] M. A. Moram, C. F. Johnston, J. L. Hollander, M. J. Kappers, and C. J. Humphreys, *Journal of Applied Physics*, 2009, **105**, 113501.
- [2] P. E. Blöchl, *Phys. Rev. B*, 1994, **50**, 17953.
- [3] G. Kresse and J. Furthmüller, *Phys. Rev. B*, 1996, **54**, 11169.
- [4] G. Kresse and J. Furthmüller, *Computational Materials Science*, 1996, **6**, 15.
- [5] J. Perdew, K. Burke, and M. Ernzerhof, *Phys. Rev. Lett.*, 1996, **77**, 3865.
- [6] G. Henkelman, B. Uberuaga, and H. Jonsson, *J. Chem. Phys.*, 2000, **113**, 9901.
- [7] C. Stampfl and C. Van de Walle, *Physical Review B*, 1998, **571**, 15052.
